# Supplementary material for: Effect of Hybrid Type and Harvesting Season on Phytochemistry and Antibacterial Activity of Extracted Metabolites from Salix Bark
Source: PubMed Central journal article supplement (PMC8915259; doi:10.1021/acs.jafc.1c08161), 2022-02-24
Supplement: jf1c08161_si_001.pdf [file jf1c08161_si_001.pdf]

# The Effect of Hybrid Type and Harvesting Season on Phytochemistry and Antibacterial Activity of Extracted Metabolites from *Salix* bark

Jinze, Dou<sup>1\*</sup>; Polina, Ilina<sup>2</sup>; Jarl, E. Hemming<sup>3</sup>; Kiia, Malinen<sup>1</sup>; Heidi, Mäkkylä<sup>2</sup>; Natália, Oliveira de Farias<sup>4</sup>; Päivi, Tammela<sup>2</sup>; Gisela, de Aragão Umbuzeiro<sup>4</sup>; Riikka, Räisänen<sup>5</sup>; Tapani, Vuorinen<sup>1</sup>

<sup>1</sup>Department of Bioproducts and Biosystems, School of Chemical Engineering, Aalto University, Finland

<sup>2</sup>Drug Research Program, Division of Pharmaceutical Biosciences, Faculty of Pharmacy, University of Helsinki, Finland

<sup>3</sup>Johan Gadolin Process Chemistry Centre, c/o Laboratory of Natural Materials Technology, Åbo Akademi University, Finland

<sup>4</sup>Laboratory of Ecotoxicology and Genotoxicity – LAEG, School of Technology, University of Campinas, Brazil

<sup>5</sup>HELSUS Helsinki Institute of Sustainability Science, Craft Studies, University of Helsinki, Finland

**Table S1.** Information on the *Salix* hybrids used in this study. Abbreviations: Kouvola (Aitomäki, Kouvola, Finland); Jyväskylä (Kyyjärvi, Jyväskylä, Finland); Svalöv (Svalöv, Sweden); Carbons (Carbons Finland Oy); VTT (VTT Technical Research Center of Finland Ltd.); Lantmännen (Lantmännen Lantbruk). Abbreviations for associating the willow hybrids with the applied experiments: 1) selection of hybrid Karin for Triandrin purification study by chromatographic (C) recovery and purification is because hybrid Karin contains equal presence of bioactive component including triandrin, picein and (+)-catechin; 2) The effect of extraction temperature/ time on the composition (mg/g) of water extract of bark (E)<sup>1</sup>; 3) The effect of hybrid type on the phytochemistry (H); 4) The effect of harvesting season on the phytochemistry (S)<sup>1</sup>; 5) Selection of willow hybrid Tora for preparative-HPLC recovery of raffinose (R) is because hybrid Tora contains the highest amount of raffinose among the studied willow hybrids; 6) Selection of willow hybrids for the antibacterial activity (A) study is based on their different abundance of bioactive chemical components; 7) The selection of willow hybrid Karin for toxicological evaluation (T) is because hybrid Karin contains equal presence of bioactive component including triandrin, picein and (+)-catechin.

| Abbreviation          | Hybrid       | Age | Growth location | Harvest time         | Supplier   | Applied experiment |
|-----------------------|--------------|-----|-----------------|----------------------|------------|--------------------|
| D1_12_04_Klara        | Klara        | 1   | Kouvola         | 4th December, 2019   | Carbons    | E; H; A            |
| D2_10_17_Karin        | Karin        | 4   | Jyväskylä       | 17th October, 2014   | VTT        | C; H; A; T         |
| D3_10_17_myrsinifolia | myrsinifolia | 4   | Jyväskylä       | 17th October, 2014   | VTT        | H; A               |
| D4_10_17_schweinni    | schweinni    | 4   | Jyväskylä       | 17th October, 2014   | VTT        | H                  |
| D5_12_04_Tordis       | Tordis       | 1   | Kouvola         | 4th December, 2019   | Carbons    | H; S               |
| D6_12_04_Schwerenee   | Schwerenee   | 1   | Kouvola         | 4th December, 2019   | Carbons    | H; S               |
| D7_12_04_Winter       | Winter       | 1   | Kouvola         | 4th December, 2019   | Carbons    | H; S               |
| D8_12_04_Tora         | Tora         | 1   | Kouvola         | 4th December, 2019   | Carbons    | H; S; R; A         |
| D9_02_06_Lisa         | Lisa         | 1   | Svalöv          | 6th February, 2020   | Lantmännen | H                  |
| D10_02_06_Linnéa      | Linnéa       | 1   | Svalöv          | 7th February, 2020   | Lantmännen | H                  |
| D11_02_06_Petra       | Petra        | 1   | Svalöv          | 8th February, 2020   | Lantmännen | H                  |
| D12_02_06_Erna        | Erna         | 1   | Svalöv          | 9th February, 2020   | Lantmännen | H; A               |
| D13_02_06_Gertrud     | Gertrud      | 1   | Svalöv          | 10th February, 2020  | Lantmännen | H                  |
| D14_02_06_Julia       | Julia        | 1   | Svalöv          | 11th February, 2020  | Lantmännen | H                  |
| D15_09_23_Agnieska    | Agnieska     | 1   | Kouvola         | 23rd September, 2019 | Carbons    | H                  |

<sup>1</sup>the hybrid selection for E and S is because of the high bioavailability of those hybrids for the planned study.

**Table S2.** Pedigree tree of *Salix* hybrids that were applied at this study.

| Variety | Parents                             | Grandparents                        | Parents of grandparents                  |
|---------|-------------------------------------|-------------------------------------|------------------------------------------|
| Karin   | <i>Salix</i> hybrid                 | <i>Salix</i> Tora                   | <i>Salix</i> schwerinii Amgunskaja       |
|         |                                     |                                     | <i>Salix</i> viminalis (L 78195/ L78101) |
|         | <i>Salix</i> viminalis Ivar "Kirov" | "Kirov"                             | <i>Salix</i> viminalis L 820332          |
|         |                                     |                                     | <i>Salix</i> ciminalis L 81102           |
|         |                                     |                                     | —                                        |
|         |                                     |                                     | —                                        |
| Klara   | <i>Salix</i> hybrid                 | <i>Salix</i> hybrid                 | <i>Salix</i> hybrid SW 911310            |
|         |                                     |                                     | <i>Salix</i> viminalis Jorr              |
|         | <i>Salix</i> hybrid                 | <i>Salix</i> viminalis Ivar "Kirov" | —                                        |
|         |                                     |                                     | —                                        |
|         |                                     |                                     | <i>Salix</i> viminalis Bowles            |
|         |                                     |                                     | —                                        |
|         | <i>Salix</i> Bjorn                  | <i>Salix</i> Scwerinii Amgunskaja   |                                          |
|         |                                     | <i>Salix</i> Viminalis Orm          |                                          |
| Lisa    | <i>Salix</i> viminalis              | —                                   | —                                        |
|         | <i>Salix</i> schwerinii             | —                                   | —                                        |
| Linnea  | <i>Salix</i> viminalis              | —                                   | —                                        |
|         | <i>Salix</i> dacyclados             | —                                   | —                                        |
|         | <i>Salix</i> eriocephala            | —                                   | —                                        |
| Petra   | <i>Salix</i> viminalis              | —                                   | —                                        |
|         | <i>Salix</i> schwerinii             | —                                   | —                                        |
| Erna    | <i>Salix</i> viminalis              | —                                   | —                                        |
|         | <i>Salix</i> schwerinii             | —                                   | —                                        |
|         | <i>Salix</i> eriocephala            | —                                   | —                                        |
| Gertrud | <i>Salix</i> viminalis              | —                                   | —                                        |
|         | <i>Salix</i> schwerinii             | —                                   | —                                        |
| Julia   | <i>Salix</i> viminalis              | —                                   | —                                        |
|         | <i>Salix</i> schwerinii             | —                                   | —                                        |
|         | <i>Salix</i> aurita                 | —                                   | —                                        |

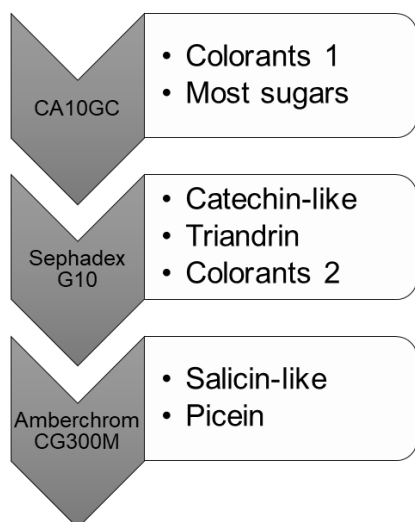

**Figure S1.** Chromatographic fractionation process of water extracts from willow (hybrid Karin) bark.<sup>1</sup>

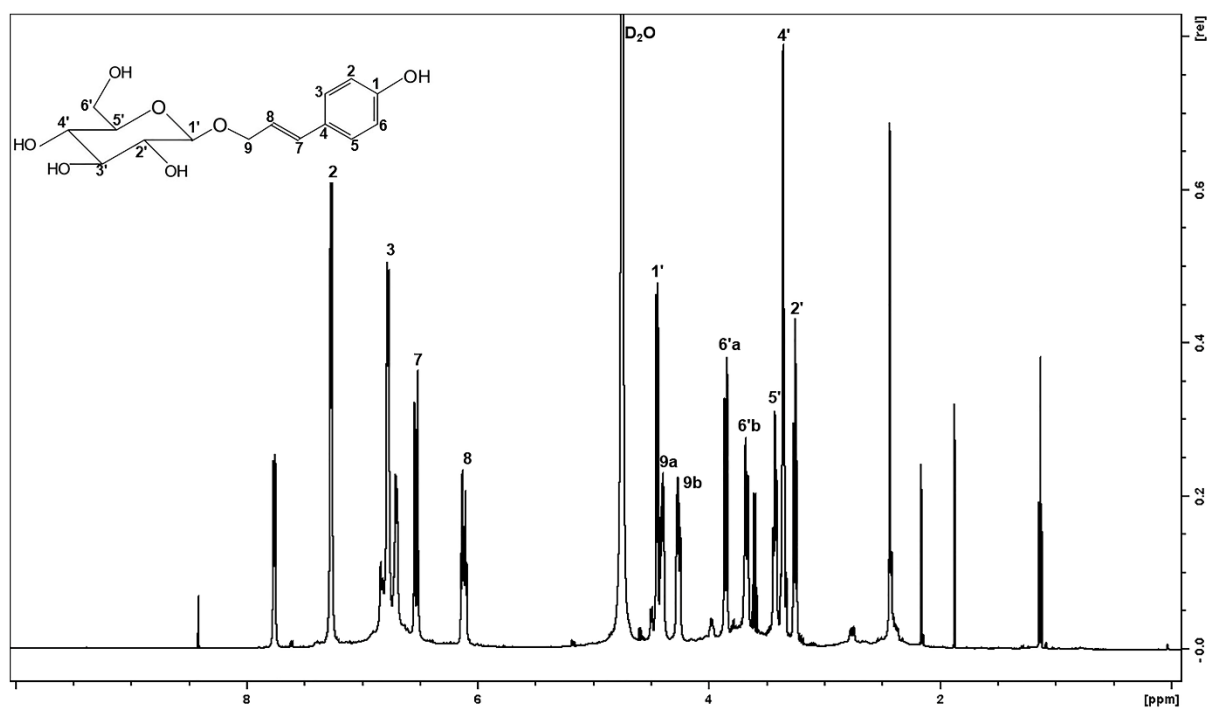

**Figure S2.** <sup>1</sup>H NMR spectrum of isolated triandrin (**Figure S1**) in D<sub>2</sub>O.

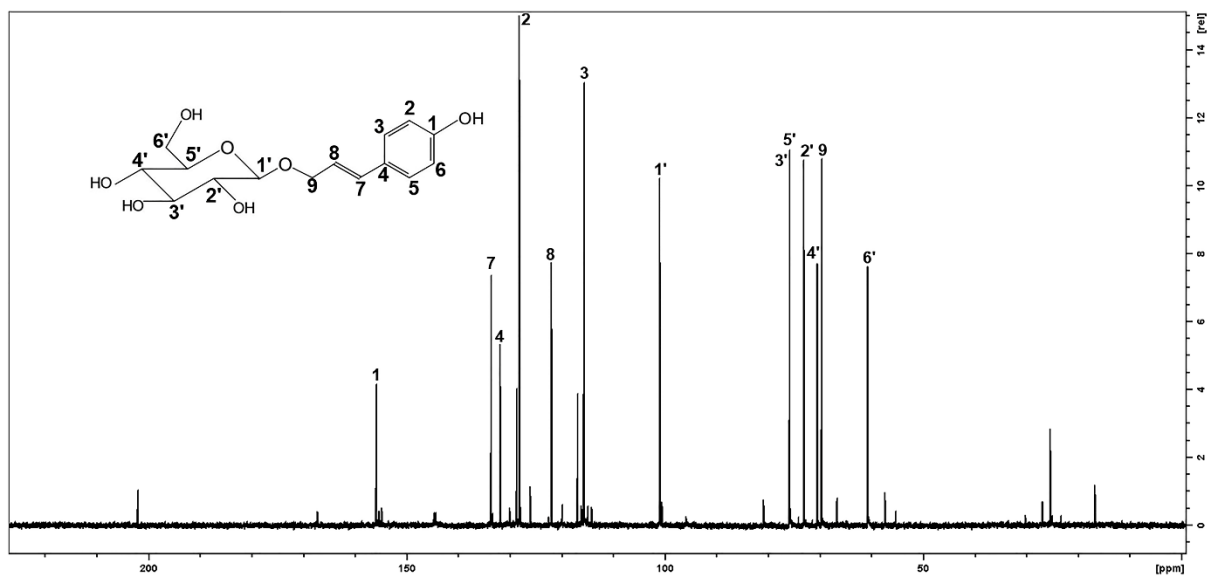

**Figure S3.**  $^{13}\text{C}$  NMR spectrum of isolated triandrin (**Figure S1**) in  $\text{D}_2\text{O}$ .

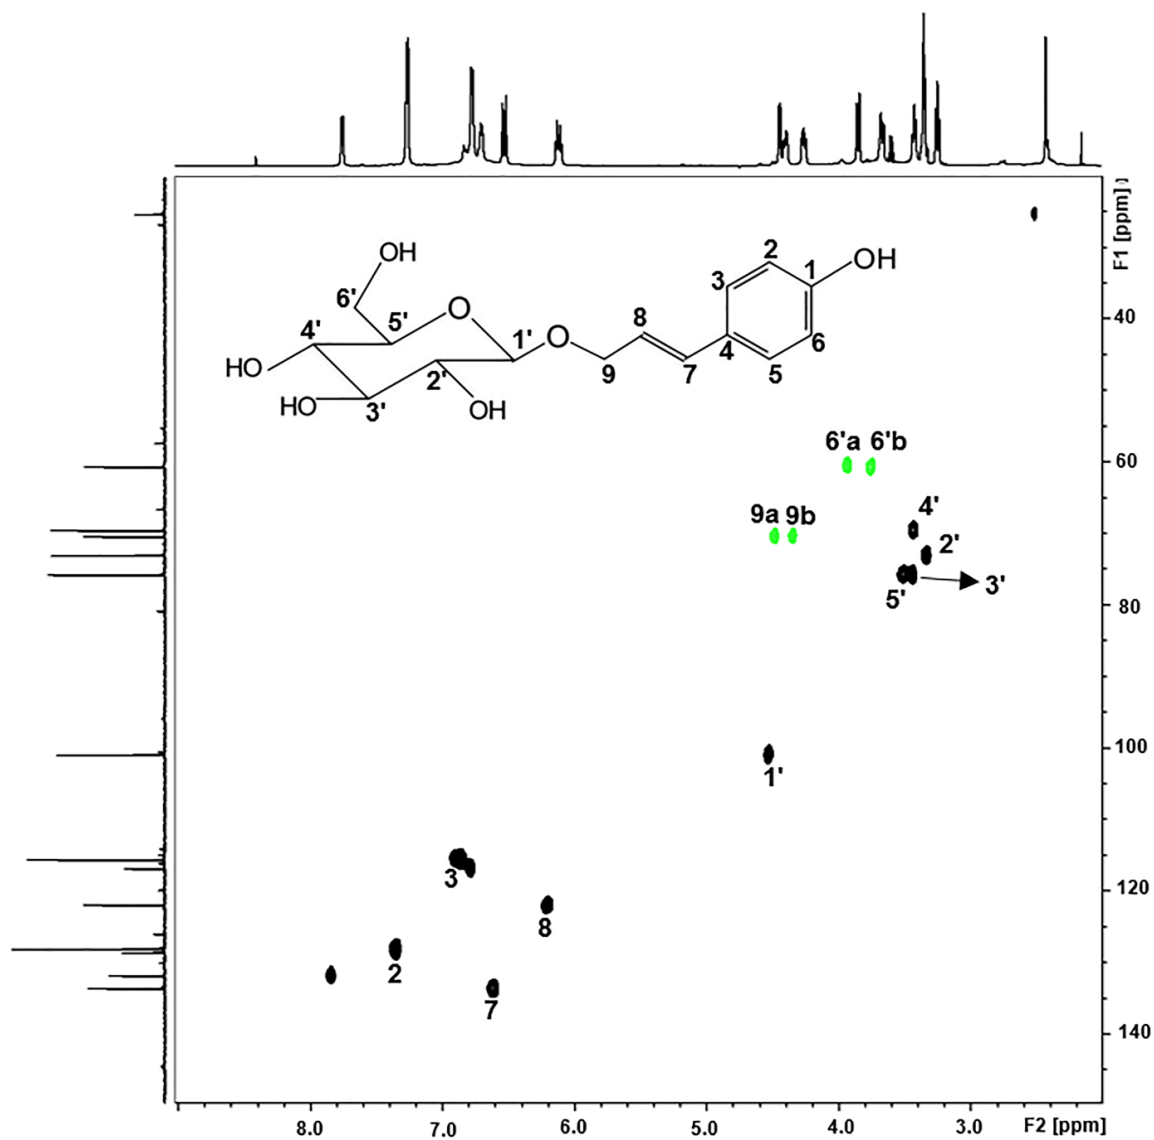

**Figure S4.** 2D  $^1\text{H}$ - $^{13}\text{C}$  HSQC NMR spectrum of isolated triandrin (**Figure S1**) in  $\text{D}_2\text{O}$ .

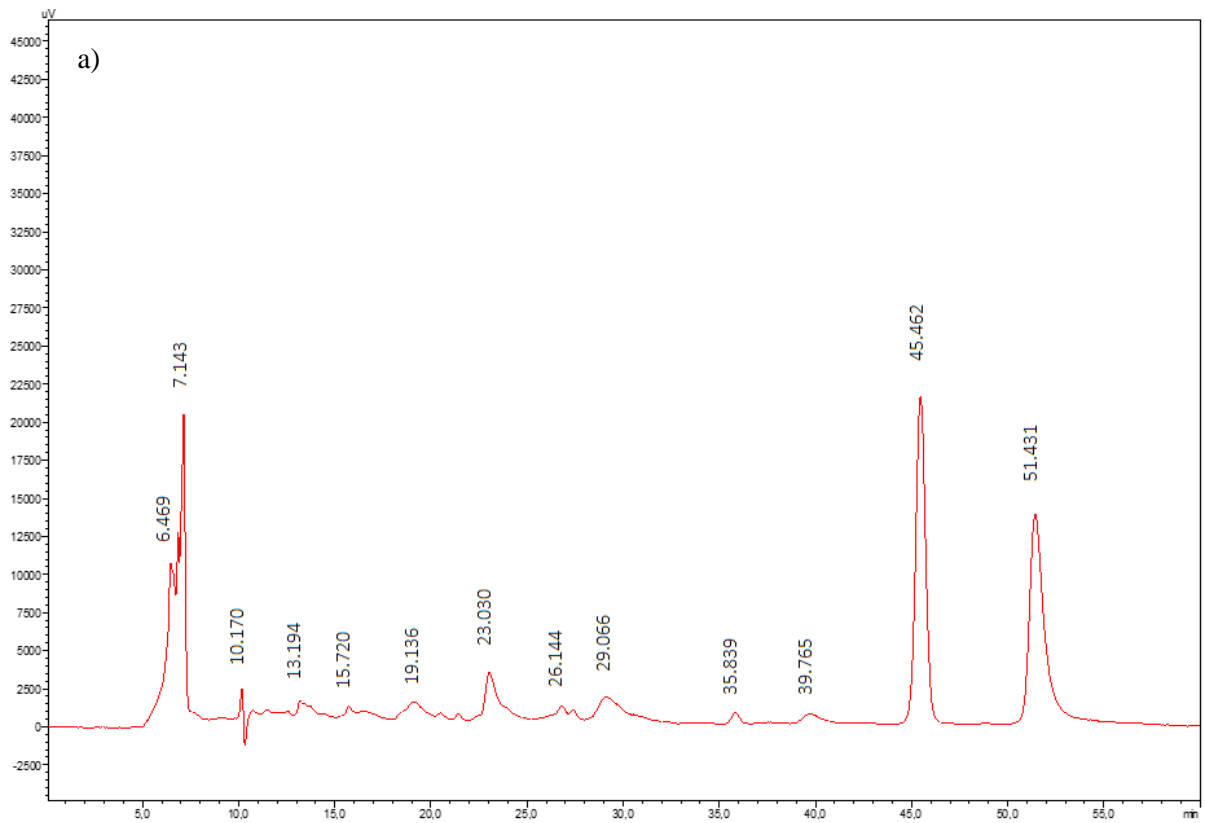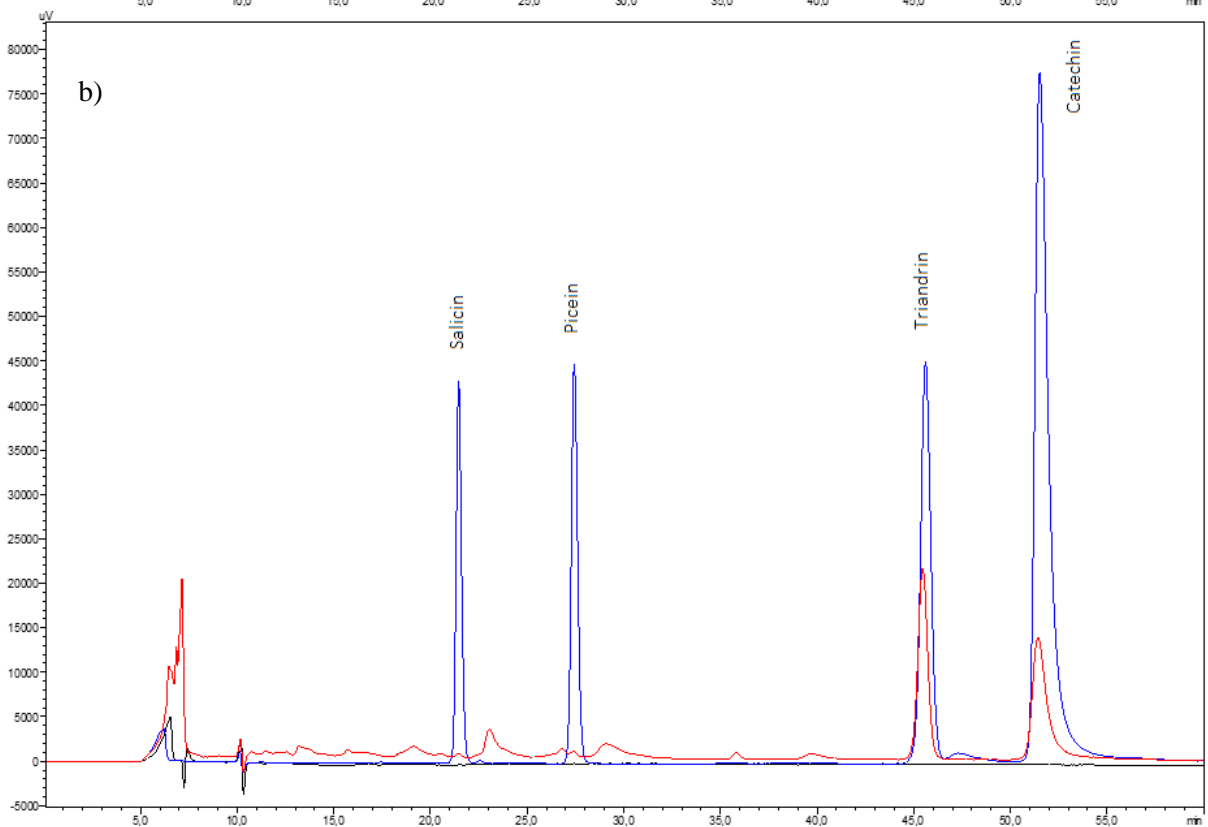

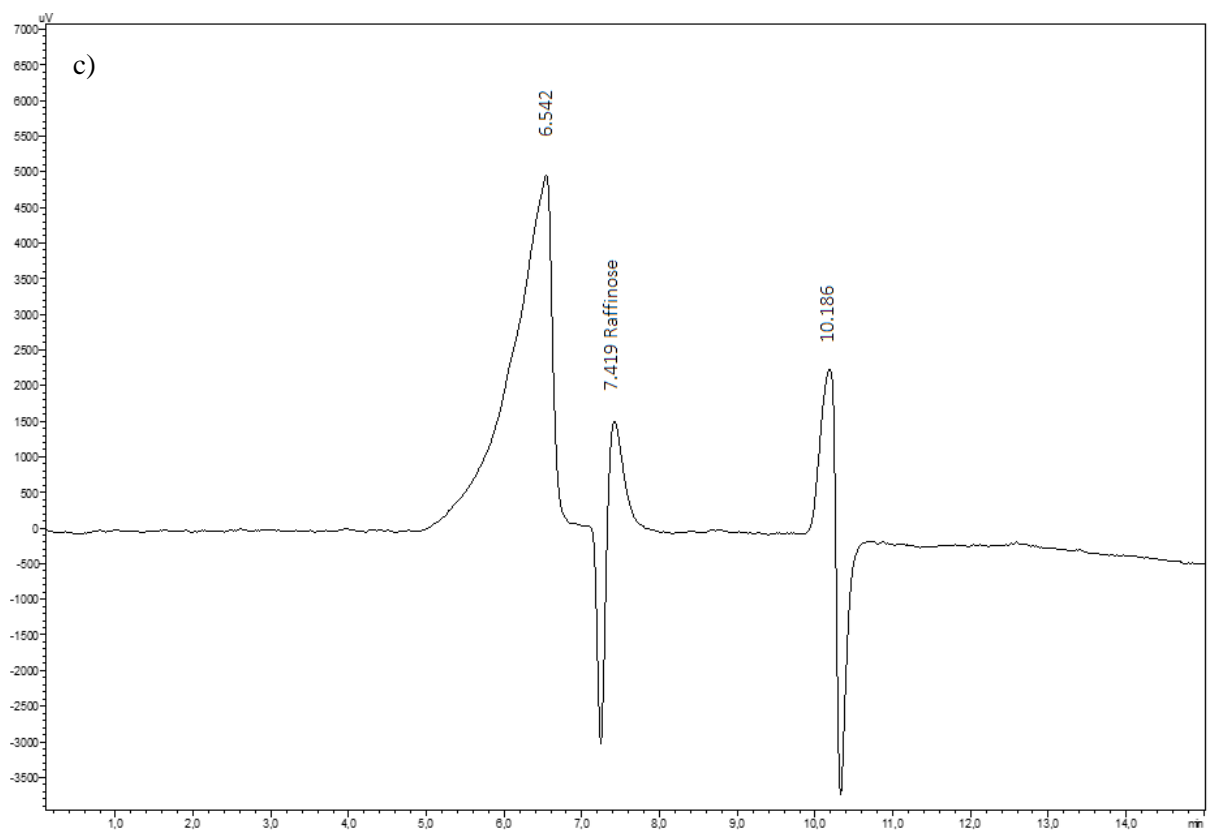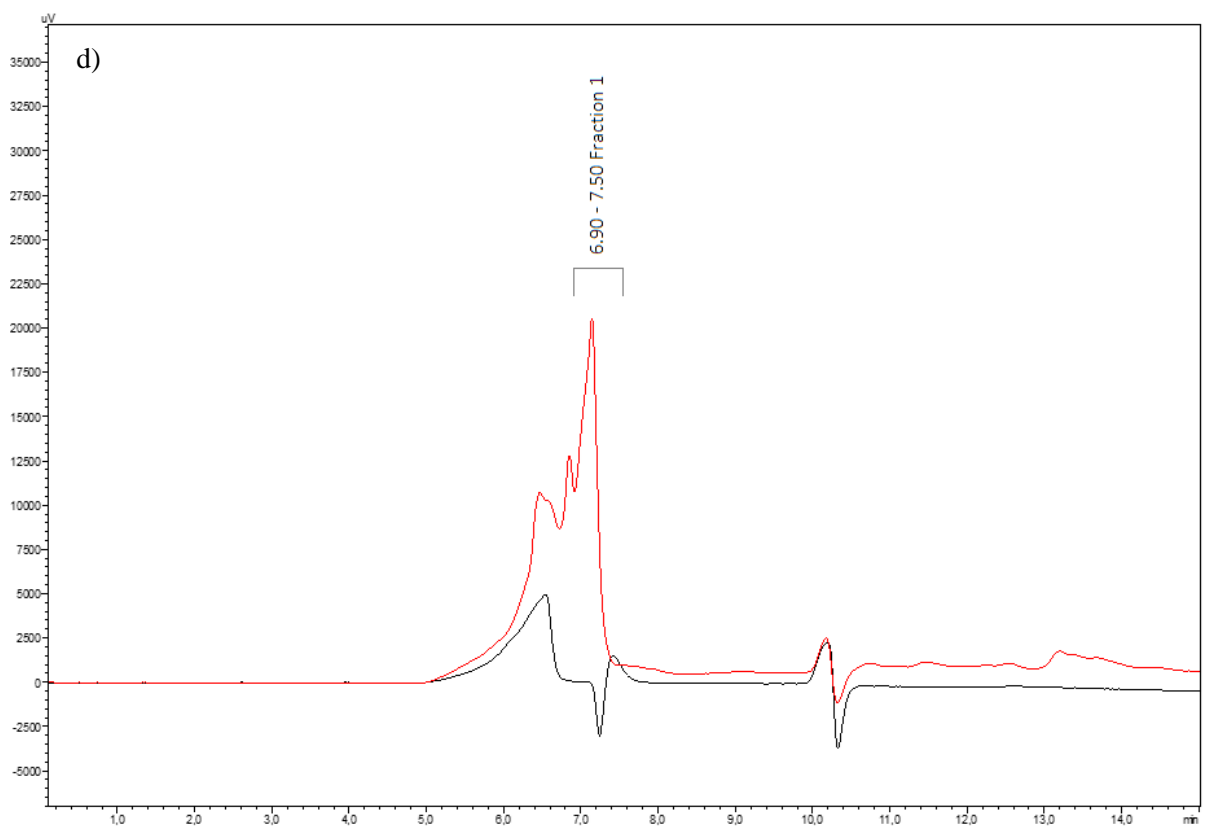

**Figure S5.** Preparative-HPLC chromatogram of a) willow hybrid Tora bark extract; b) overlay between the bark extract (red), raffinose (black) and a standard mixture (blue); c) authentic raffinose; d) overlay between Tora water extract (red) and raffinose (black) with marking of the separated raffinose-rich fraction.

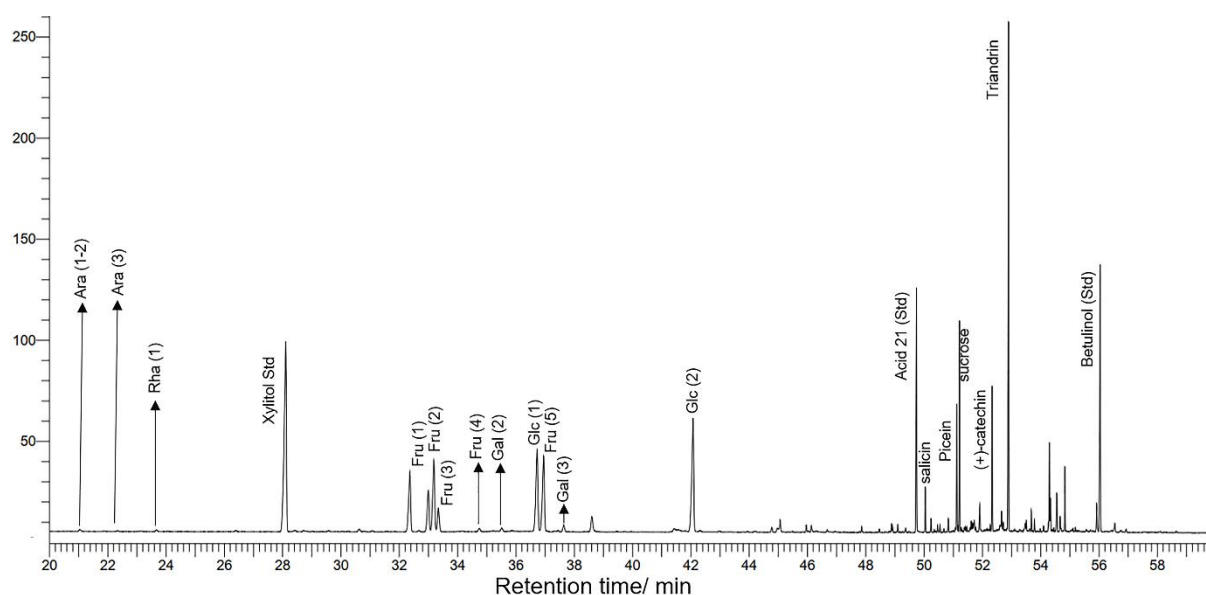

**Figure S6.** Gas chromatogram of trimethylsilylated Klara bark water extract with assignments of the major components. Temperature program I: Split: 1:30; Inj.: 250 °C; Column: 100 °C, 8 min, 2 °C/min, 170 °C, 12 °C/min, 310 °C for 5 min.

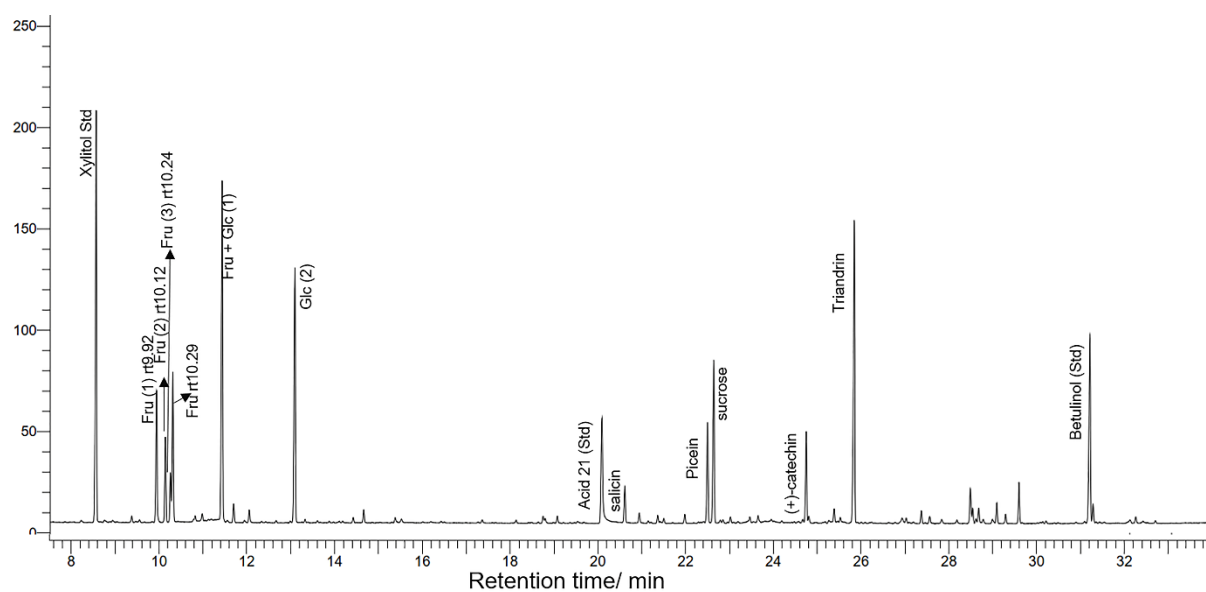

**Figure S7.** Gas chromatogram of trimethylsilylated Klara bark water extract with assignments of the major components. Temperature program II: Split: 1:25.8; Inj.: 250 °C; 120 °C, 1 min, 6 °C/min, 320 °C for 15 min.

**Table S3.** Effect of particle size (cut to 2 cm or ground to 1mm) of willow bark (hybrids Klara and Karin) on gravimetric water extract yield. The extraction was carried out at 80 °C for 20 min.

|                  | Yield (%) |
|------------------|-----------|
| Klara Bark (2cm) | 14        |
| Karin Bark (2cm) | 12        |
| Klara bark (1mm) | 21        |
| Karin bark (1mm) | 16        |



**Table S4.** Effect of extraction temperature on the composition (mg/g) of water extract of bark of willow hybrid Klara based on one independent measurement. The extraction time was 20 min. The analytical techniques used for quantitative analyses were GC–FID with temperature program I (FID\_M1) (Figure S6) and temperature program II (FID\_M2) (Figure S7) and HPAEC–PAD (PAD). Abbreviations: Glucuronic acid (GlcA).

| T (°C)               | 50     |        |     | 60     |        |     | 70     |        |     | 80     |        |     | 90     |        |     | 100    |        |     |
|----------------------|--------|--------|-----|--------|--------|-----|--------|--------|-----|--------|--------|-----|--------|--------|-----|--------|--------|-----|
| Analytical technique | FID_M2 | FID_M1 | PAD | FID_M2 | FID_M1 | PAD | FID_M2 | FID_M1 | PAD | FID_M2 | FID_M1 | PAD | FID_M2 | FID_M1 | PAD | FID_M2 | FID_M1 | PAD |
| Salicin              | 5.1    | 4.0    | —   | 5.1    | 4.0    | —   | 5.1    | 4.0    | —   | 8.0    | 6.0    | —   | 7.1    | 5.7    | —   | 8.3    | 6.4    | —   |
| Picein               | 22.2   | 19.5   | —   | 22.1   | 19.3   | —   | 22.1   | 19.0   | —   | 22.2   | 17.5   | —   | 21.7   | 19.0   | —   | 21.1   | 18.3   | —   |
| (+)-Catechin         | 22.3   | 20.8   | —   | 23.2   | 21.8   | —   | 23.4   | 22.3   | —   | 20.2   | 18.3   | —   | 23.2   | 21.8   | —   | 23.9   | 21.4   | —   |
| Triandrin            | 95.6   | 86.1   | —   | 95.4   | 86.8   | —   | 94.6   | 86.8   | —   | 76.7   | 68.3   | —   | 93.0   | 84.8   | —   | 90.3   | 82.4   | —   |
| Total aromatic       | 145.2  | 130.4  | —   | 145.8  | 131.9  | —   | 145.2  | 132.2  | —   | 127.4  | 110.1  | —   | 145.0  | 131.3  | —   | 143.6  | 128.4  | —   |
| Sucrose              | 17.7   | 10.8   | —   | 14.6   | 10.5   | —   | 14.7   | 9.2    | —   | 32.1   | 22.2   | —   | 16.3   | 11.1   | —   | 14.1   | 10.2   | —   |
| Monosugars           | 142.7  | 152.2  | 187 | 150.6  | 162.5  | 146 | 147.2  | 155.7  | 141 | 159.5  | 174.4  | 169 | 133.4  | 141.8  | 155 | 118.1  | 130.3  | 134 |
| Total sugars         | 160.4  | 163.0  | —   | 165.2  | 173.0  | —   | 161.9  | 164.8  | —   | 191.6  | 196.6  | —   | 149.7  | 152.9  | —   | 132.2  | 140.5  | —   |
| GlcA                 | —      | 0.2    | —   | —      | 0.2    | —   | —      | 0.2    | —   | —      | 0.2    | —   | —      | 0.2    | —   | —      | 0.2    | —   |

**Table S5.** Effect of extraction time on the composition (mg/g) of water extract of bark of willow hybrid Klara based on one independent measurement. The extraction temperature was 80 °C. The analytical techniques used for quantitative analyses were GC–FID with temperature program I (FID\_M1) (Figure S6) and temperature program II (FID\_M2) (Figure S7) and HPAEC–PAD (PAD). Abbreviations: Glucuronic acid (GlcA).

| Time (min)           | 10     |        |     | 20     |        |     | 30     |        |     | 60     |        |     | 90     |        |     | 120    |        |     |
|----------------------|--------|--------|-----|--------|--------|-----|--------|--------|-----|--------|--------|-----|--------|--------|-----|--------|--------|-----|
| Analytical technique | FID_M2 | FID_M1 | PAD | FID_M2 | FID_M1 | PAD | FID_M2 | FID_M1 | PAD | FID_M2 | FID_M1 | PAD | FID_M2 | FID_M1 | PAD | FID_M2 | FID_M1 | PAD |
| Salicin              | 5.4    | 4.3    | —   | 8.0    | 6.0    | —   | 5.8    | 4.8    | —   | 6.3    | 4.9    | —   | 7.7    | 6.0    | —   | 7.8    | —      | —   |
| Picein               | 21.7   | 18.0   | —   | 22.2   | 17.5   | —   | 20.1   | 17.8   | —   | 21.2   | 18.5   | —   | 21.3   | 17.8   | —   | 21.8   | —      | —   |
| (+)-Catechin         | 23.9   | 22.8   | —   | 20.2   | 18.3   | —   | 22.0   | 20.8   | —   | 22.7   | 22.1   | —   | 23.3   | 22.1   | —   | 22.7   | —      | —   |
| Triandrin            | 93.7   | 85.6   | —   | 76.7   | 68.3   | —   | 88.7   | 80.5   | —   | 91.6   | 84.2   | —   | 91.4   | 84.7   | —   | 93.7   | —      | —   |
| Total aromatic       | 144.8  | 130.7  | —   | 127.4  | 110.1  | —   | 136.7  | 124.0  | —   | 141.9  | 129.6  | —   | 143.6  | 130.6  | —   | 145.9  | —      | —   |
| Sucrose              | 22.1   | 11.3   | —   | 32.1   | 22.2   | —   | 19.5   | 17.7   | —   | 20.6   | 16.4   | —   | 16.0   | 9.9    | —   | 15.7   | —      | —   |
| Monosugars           | 128.3  | 138.6  | 149 | 159.5  | 174.4  | 169 | 119.0  | 144.2  | 151 | 116.1  | 131.6  | 145 | 122.1  | 131.7  | 138 | 125.4  | —      | 152 |
| Total sugars         | 150.4  | 149.9  | —   | 191.6  | 196.6  | —   | 138.5  | 161.9  | —   | 136.7  | 148.0  | —   | 138.1  | 141.6  | —   | 141.1  | —      | —   |
| GlcA                 | —      | 0.21   | —   | —      | 0.25   | —   | —      | 0.23   | —   | —      | 0.21   | —   | —      | 0.20   | —   | —      | —      | —   |

**Table S6.** Monosaccharide content (mg/g) of water extracts of willow (hybrid Klara) bark quantified by GC–FID (FID, temperature program I) and HPAEC–PAD (PAD) based on one independent measurement. Abbreviations: Arabinose (Ara), Rhamnose (Rha), Galactose (Gal), Glucose (Glc), Xylose (Xyl), Mannose (Man), Fructose (Fru). Abbreviation T80t10 refers to the extraction was performed for 10min under 80°C.

|                 | T80t10 |       | T80t20 |       | T80t30 |       | T80t60 |       | T80t90 |       | T50t20 |       | T60t20 |       | T70t20 |       | T90t20 |       | T100t20 |       |
|-----------------|--------|-------|--------|-------|--------|-------|--------|-------|--------|-------|--------|-------|--------|-------|--------|-------|--------|-------|---------|-------|
|                 | FID-I  | PAD   | FID-I  | PAD   | FID-I  | PAD   | FID-I  | PAD   | FID-I  | PAD   | FID-I  | PAD   | FID-I  | PAD   | FID-I  | PAD   | FID-I  | PAD   | FID-I   | PAD   |
| Ara             | 0.4    | 0.9   | 0.4    | 0.6   | 0.2    | 0.8   | 0.2    | 0.8   | 0.3    | 0.8   | 0.4    | 1.1   | 0.4    | 0.9   | 0.2    | 0.7   | 0.4    | 0.9   | 0.3     | 0.8   |
| Rha             | 0.0    | 0.8   | 0.6    | 0.8   | 0.5    | 0.7   | 0.5    | 0.6   | 0.1    | 0.6   | 0.0    | 1.0   | 0.6    | 0.8   | 0.6    | 0.7   | 0.0    | 0.6   | 0.5     | 0.7   |
| Gal             | 3.2    | 3.9   | 3.3    | 3.6   | 3.3    | 3.9   | 3.0    | 3.7   | 2.7    | 3.5   | 3.3    | 4.7   | 3.5    | 3.8   | 3.4    | 3.6   | 3.0    | 4.0   | 2.7     | 3.6   |
| Glc             | 49.3   | 68.6  | 67.0   | 82.1  | 53.5   | 68.9  | 47.4   | 66.6  | 48.8   | 63.6  | 54.1   | 87.0  | 58.6   | 66.8  | 56.1   | 65.6  | 51.4   | 70.7  | 46.9    | 64.5  |
| Xyl             | 0.0    | 0.0   | 0.0    | 0.0   | 0.0    | 0.0   | 0.0    | 0.0   | 0.0    | 0.0   | 0.0    | 0.0   | 0.0    | 0.0   | 0.0    | 0.0   | 0.0    | 0.0   | 0.0     | 0.0   |
| Man             | 0.1    | 0.2   | 0.4    | 0.5   | 0.0    | 0.2   | 0.0    | 0.2   | 0.1    | 0.1   | 0.0    | 0.1   | 0.0    | 0.1   | 0.0    | 0.2   | 0.0    | 0.1   | 0.0     | 0.3   |
| Fru             | 85.7   | 74.9  | 102.7  | 81.0  | 86.7   | 76.4  | 80.6   | 73.2  | 79.7   | 69.8  | 94.3   | 92.8  | 99.4   | 73.9  | 95.3   | 70.6  | 87.0   | 78.8  | 79.9    | 70.0  |
| monosaccharides | 138.6  | 149.2 | 174.4  | 168.6 | 144.2  | 150.9 | 131.6  | 145.1 | 131.7  | 138.4 | 152.2  | 186.7 | 162.5  | 146.3 | 155.7  | 141.3 | 141.8  | 155.0 | 130.3   | 139.9 |

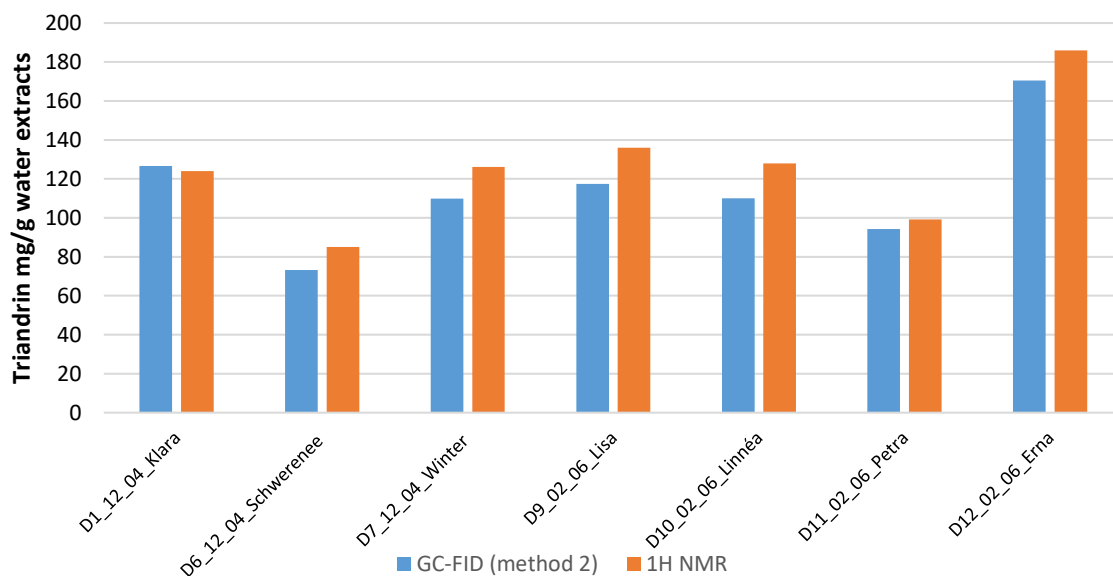

**Figure S8.** Content of triandrin in water extracts of seven willow hybrids (**Figure 5** and **Table S2**) analyzed by GC-FID (temperature program II, **Figure S7**) and  $^1\text{H}$  NMR spectroscopy (integration of H-2 and H-3 protons relative to 1,3,5-trioxane) based on one independent measurement.

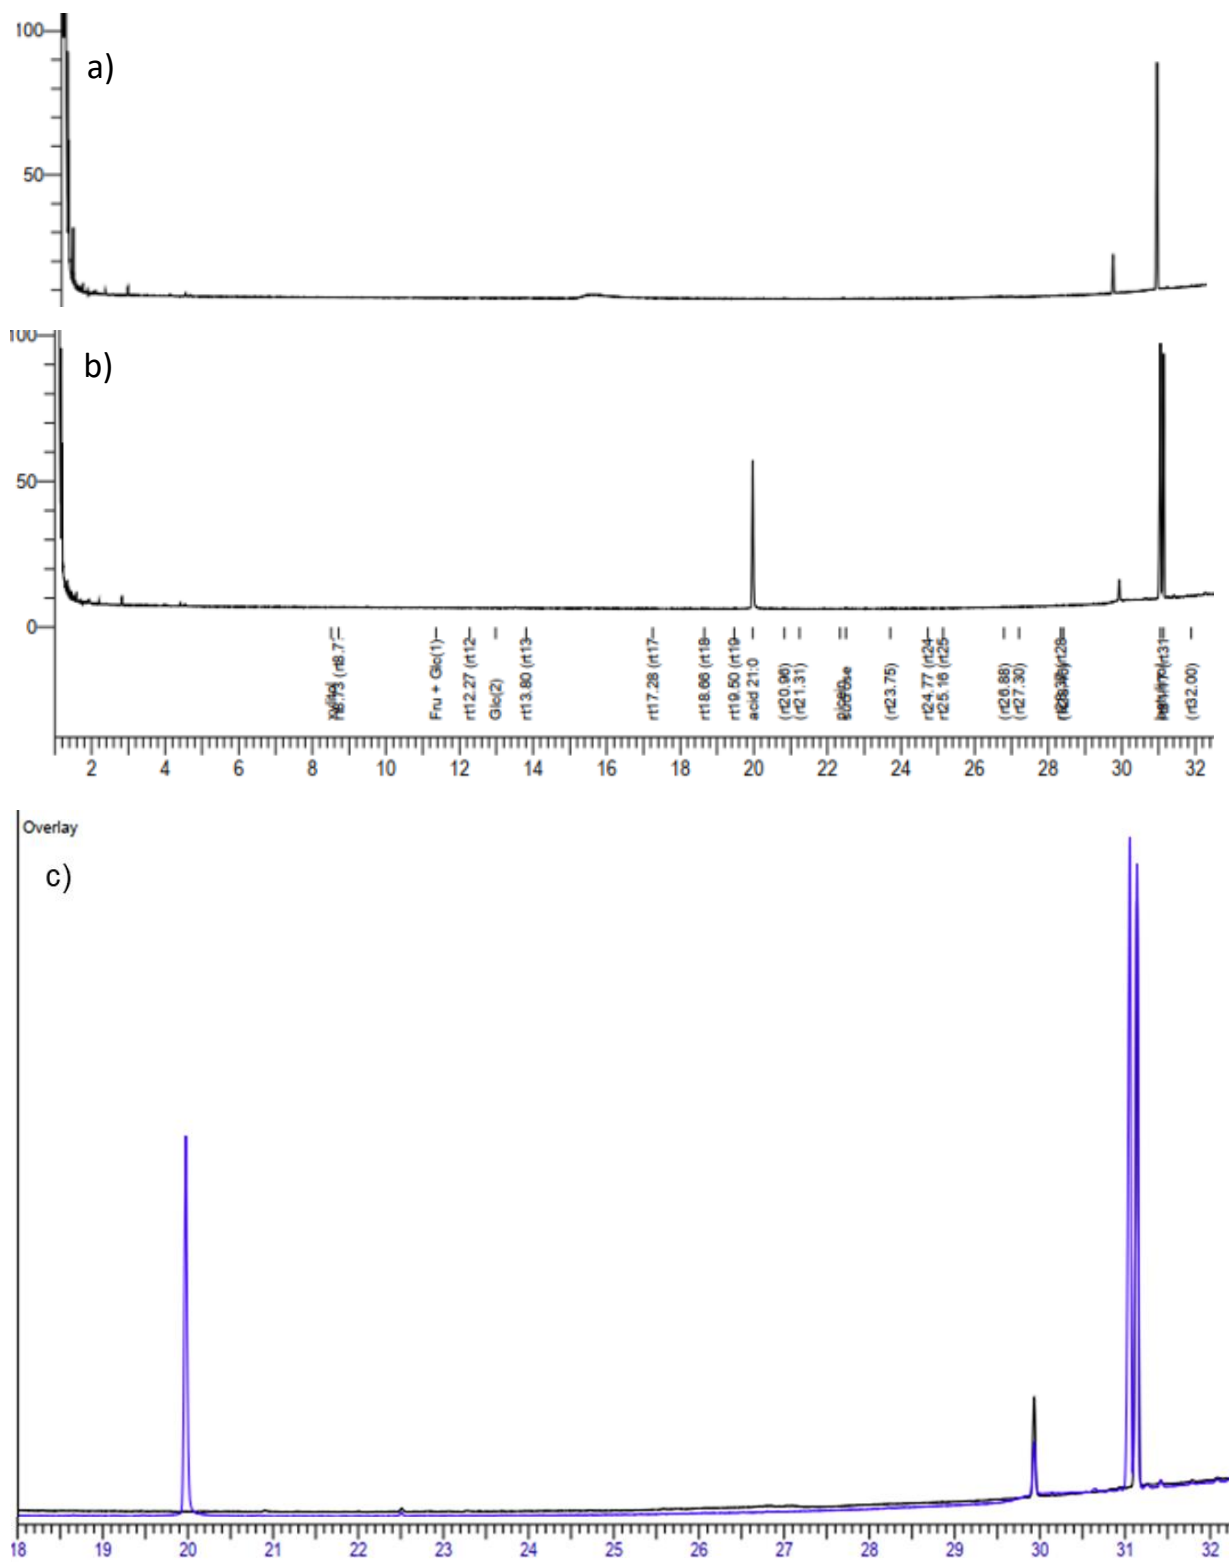

**Figure S9.** Gas chromatogram (*temperature program II*, **Figure S7**) of the trimethylsilyl derivatives of a) authentic raffinose; b) raffinose with added betulinol; c) overlay between chromatograms a and b.

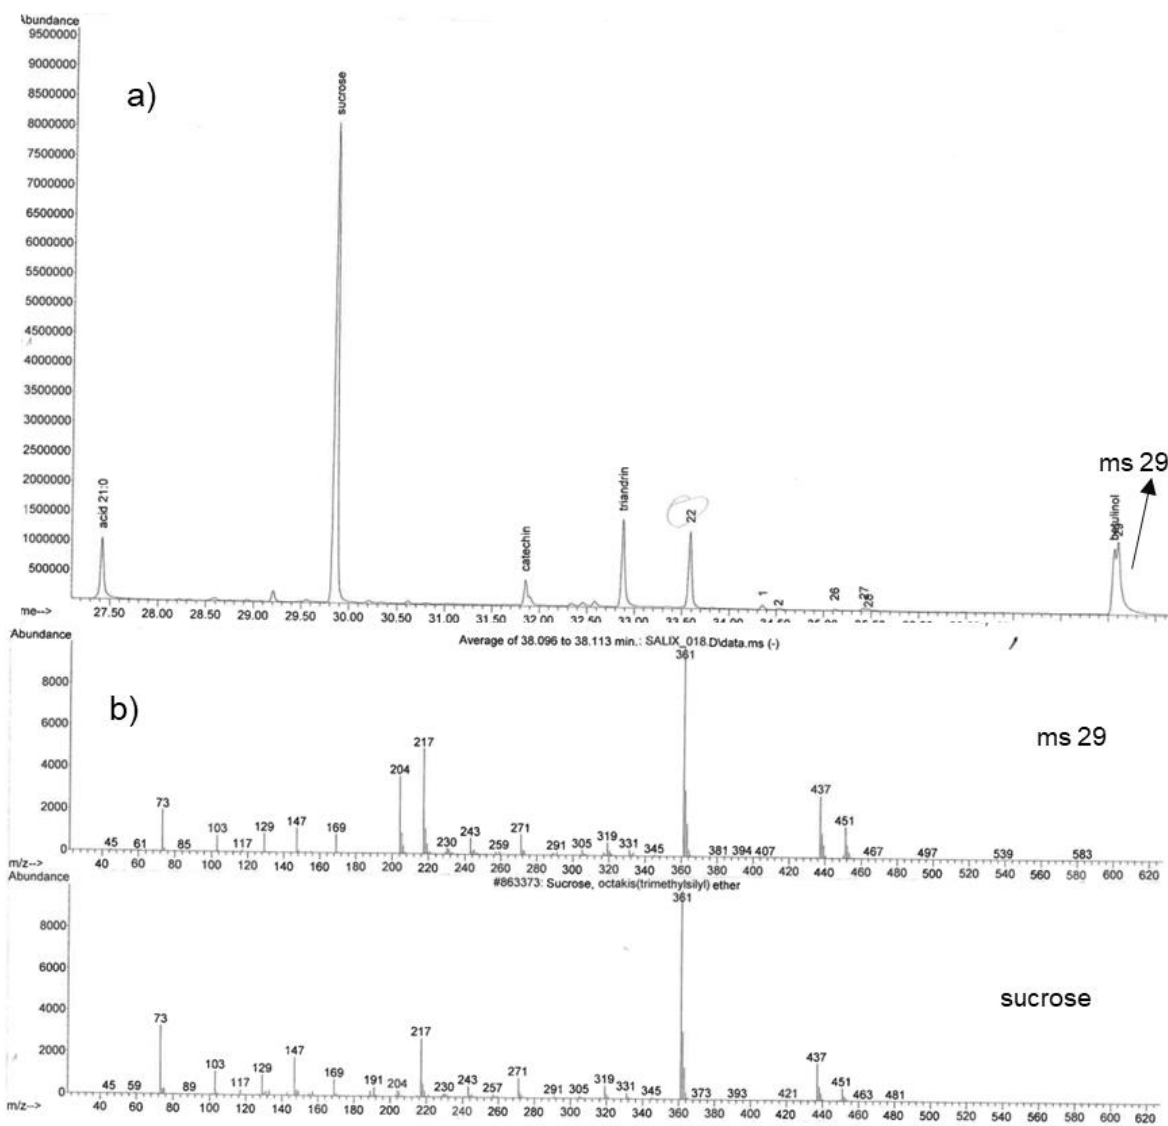

**Figure S10.** a) Gas chromatogram of trimethylsilylated willow hybrid Tora bark extract; b) mass spectra of peak ms 29 (raffinose) and sucrose. The GC-MS instrument was Hewlett Packard (HP) G1530A GC coupled to a HP MSD 5973. The column was Agilent Technologies HP-1, 25 m x 0.200 mm i.d., film thickness 0.11  $\mu$ m. The carrier gas was He at flow rate of 0.8 mL/min. Program: Splitless, Inj.: 300  $^{\circ}$ C; Column: 80  $^{\circ}$ C, 1 min, 6  $^{\circ}$ C/min, 320  $^{\circ}$ C for 5 min.

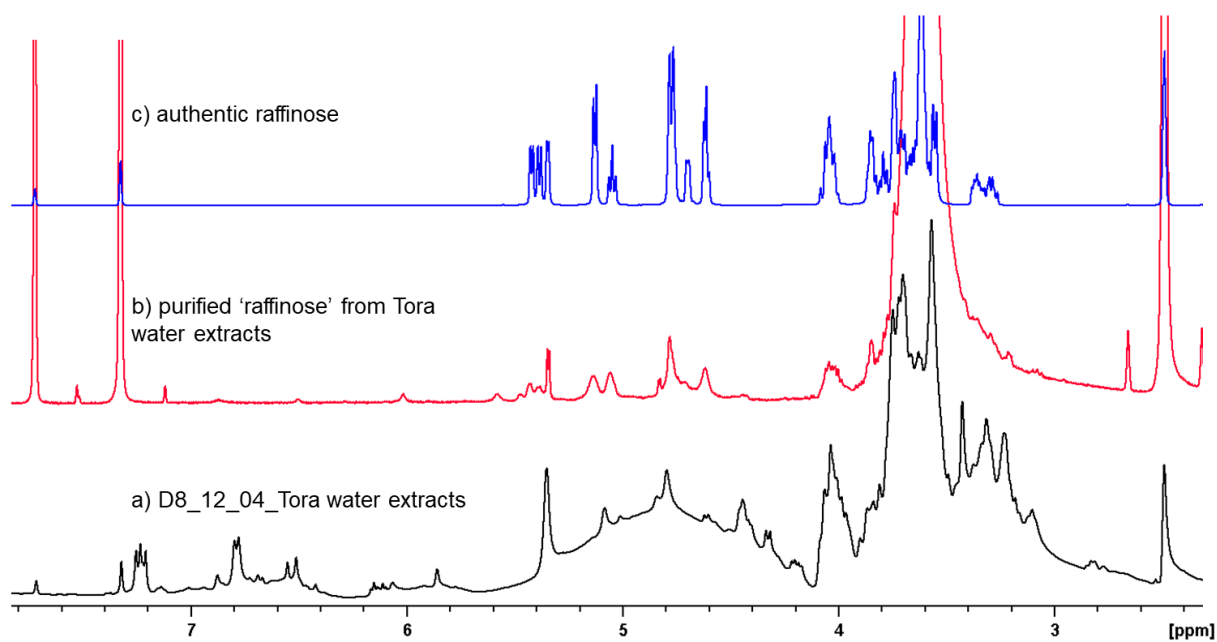

**Figure S11.**  $^1\text{H}$  NMR spectra of a) Tora bark water extract; b) purified 'raffinose-rich' fraction; c) authentic raffinose in  $\text{DMSO-}d_6/\text{pyridine-}d_5$ .

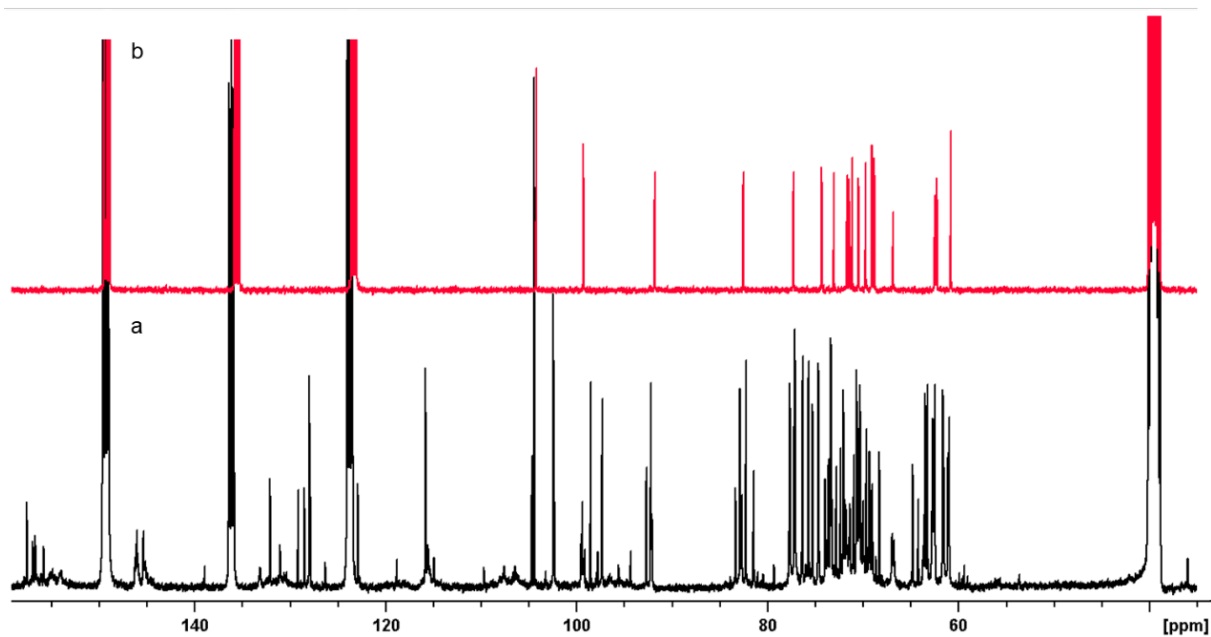

**Figure S12.**  $^{13}\text{C}$  NMR spectra of a) Tora bark water extract; b) authentic raffinose in  $\text{DMSO-}d_6/\text{pyridine-}d_5$ .  $^{13}\text{C}$  NMR spectrum of the purified 'raffinose-rich' fraction is not included as its concentration was low to get a proper spectrum.

**Table S7.** Standard deviations (included in the parentheses) for **Figure 4**. For abbreviations, see **Figure 4**.

| Hybrid           | content (mg/g extract) | 02_17       | 04_24       | 07_12       | 09_23       | 12_04       |
|------------------|------------------------|-------------|-------------|-------------|-------------|-------------|
| Tordis           | salicin                | 0.3 (0)     | 0.4 (0.1)   | 0.4 (0)     | 0.6 (0)     | 0.4 (0.1)   |
|                  | picein                 | 0.0 (0)     | 0.1 (0)     | 0.0 (0)     | 1.6 (0)     | 0.0 (0)     |
|                  | (+)-catechin           | 12.7 (0.4)  | 10.4 (0.3)  | 7.3 (0.2)   | 26.4 (0.4)  | 16.7 (0.7)  |
|                  | triandrin              | 37.0 (1.4)  | 42.3 (0.6)  | 38.2 (1.2)  | 59.3 (0.9)  | 50.2 (2.7)  |
|                  | raffinose              | 16.3 (0.5)  | 2.4 (0)     | 0.7 (0)     | 11.5 (0.2)  | 66.8 (3.7)  |
|                  | glucose + fructose     | 137.3 (0.4) | 164.5 (4.2) | 198.1 (9.7) | 102.1 (1.2) | 106.0 (2.3) |
|                  | sucrose                | 67.9 (1.4)  | 15.6 (0.4)  | 21.0 (2.0)  | 108.5 (2.3) | 93.0 (5.2)  |
| S.<br>schwerenee | salicin                | 10.4 (0.1)  | 12.2 (0.2)  | 11.4 (0.1)  | 16.6 (0.1)  | 10.7 (0.2)  |
|                  | picein                 | 0.1 (0)     | 0.1 (0)     | 0.0 (0)     | 0.1 (0)     | 0.0 (0)     |
|                  | (+)-catechin           | 11.0 (0)    | 10.5 (0.2)  | 7.1 (0)     | 22.5 (0.1)  | 15.0 (0.6)  |
|                  | triandrin              | 48.8 (0.1)  | 60.8 (0.9)  | 70.4 (0)    | 143.0 (2.0) | 73.2 (4.6)  |
|                  | raffinose              | 16.6 (0.1)  | 1.2 (0)     | 0.3 (0)     | 12.7 (0.1)  | 83.1 (3.9)  |
|                  | glucose + fructose     | 216.1 (4.6) | 178.1 (15)  | 188.2 (1.7) | 44.6 (1.0)  | 143.8 (2.6) |
|                  | sucrose                | 15.8 (0.6)  | 3.8 (0.5)   | 6.2 (0.1)   | 70.3 (3.4)  | 74.7 (3.5)  |
| Winter           | salicin                | 0.5 (0)     | 11.2 (0.2)  | 8.4 (0.3)   | 0.9 (0)     | 6.0 (0.2)   |
|                  | picein                 | 0.8 (0.1)   | 0.0 (0)     | 0.0 (0)     | 1.6 (0)     | 0.1 (0)     |
|                  | (+)-catechin           | 14.7 (0.4)  | 18.5 (0.2)  | 9.5 (0)     | 26.5 (0.4)  | 19.6 (0.1)  |
|                  | triandrin              | 29.9 (0.9)  | 145.2 (2.1) | 98.0 (0)    | 93.0 (1.8)  | 109.9 (0.6) |
|                  | raffinose              | 28.7 (0.4)  | 1.9 (0)     | 0.5 (0)     | 8.0 (0.1)   | 119.2 (0.1) |
|                  | glucose + fructose     | 209.5 (5.0) | 144.8 (3.9) | 178.1 (0)   | 83.8 (2.0)  | 125.8 (4.3) |
|                  | sucrose                | 77.7 (0.3)  | 6.5 (0.2)   | 7.4 (0.2)   | 67.2 (2.8)  | 87.7 (5.7)  |
| Tora             | salicin                | 4.5 (0.1)   | 1.1 (0)     | 0.8 (0.1)   | 1.1 (0.2)   | 0.9 (0)     |
|                  | picein                 | 11.5 (0.5)  | 1.0 (0)     | 1.2 (0)     | 0.1 (0)     | 0.9 (0.1)   |
|                  | (+)-catechin           | 19.3 (0.4)  | 10.6 (0.2)  | 10.1 (0)    | 18.1 (0.1)  | 18.8 (0.2)  |
|                  | triandrin              | 49.7 (0.9)  | 32.8 (0.9)  | 36.2 (0.1)  | 101.5 (0.1) | 39.1 (1.8)  |
|                  | raffinose              | 85.8 (1.6)  | 1.1 (0.1)   | 0.4 (0)     | 23.0 (0.2)  | 103.1 (0.7) |
|                  | glucose + fructose     | 146.7 (4.9) | 243.9 (18)  | 223.9 (3.8) | 40.5 (1.1)  | 142.8 (0.9) |
|                  | sucrose                | 54.2 (2.8)  | 6.4 (0.5)   | 10.3 (0.1)  | 130.6 (7.8) | 126.5 (6.3) |

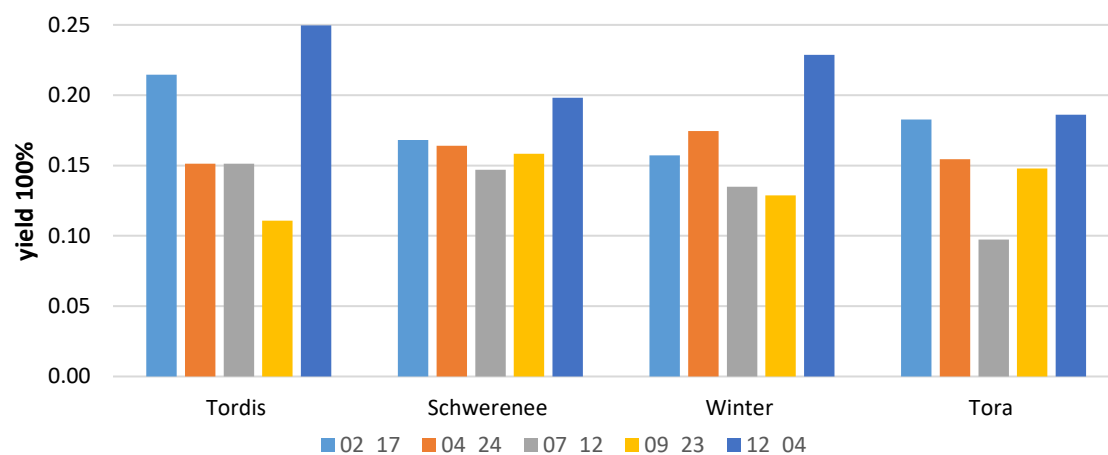

**Figure S13.** Hot water extract yield from selected *Salix* hybrids (Tordis, Schwerenee, Winter and Tora) based on one independent measurement. Sample abbreviations see **Figure 4**.

**Table S8.** Chemical composition (mg/g) of bark extracts from *Salix* hybrids quantified by gas chromatography (GC)-flame ionization detection (FID). For title abbreviations, see **Table S1**. SD = standard deviation.

|                       | salicin (SD) | picein (SD) | (+)-catechin (SD) | (-)-epicatechin (SD) | triandrin (SD) | raffinose (SD) | glucose + fructose (SD) | sucrose (SD) | total assigned |
|-----------------------|--------------|-------------|-------------------|----------------------|----------------|----------------|-------------------------|--------------|----------------|
| D1_12_04_Klara        | 7.5 (0)      | 0.1 (0.1)   | 21.2 (0)          | 0.1 (0)              | 126.6 (0.3)    | 30.6 (0.5)     | 148.6 (0.1)             | 45.5 (0.6)   | 380            |
| D2_10_17_Karin        | 1.3 (0.2)    | 50.7 (1.8)  | 19.2 (0.6)        | 0.2 (0.1)            | 44.9 (1.3)     | 0.5 (0.1)      | 143.7 (2.4)             | 1.1 (0.9)    | 262            |
| D3_10_17_myrsinifolia | 23.7 (0.8)   | 114.4 (7.0) | 12.4 (0.7)        | 0.2 (0)              | 8.3 (0.5)      | 0.6 (0.1)      | 124.6 (0.1)             | 0.8 (0.6)    | 285            |
| D4_10_17_schweinni    | 0.6 (0.1)    | 0.2 (0)     | 13.2 (0)          | 0.4 (0.1)            | 48.1 (0.7)     | 0.7 (0)        | 117.8 (0)               | 1.1 (0.6)    | 182            |
| D5_12_04_Tordis       | 0.4 (0.1)    | 0.0 (0)     | 16.7 (0.7)        | 0.1 (0.1)            | 50.2 (2.7)     | 66.8 (3.7)     | 106.0 (0.3)             | 93.0 (0.5)   | 333            |
| D6_12_04_Schwerenee   | 10.7 (0.2)   | 0.0 (0.1)   | 15.0 (0.6)        | 0.0 (0)              | 73.2 (4.6)     | 83.1 (3.9)     | 143.8 (0.8)             | 74.7 (0.9)   | 400            |
| D7_12_04_Winter       | 6.0 (0.2)    | 0.1 (0)     | 19.6 (0.1)        | 0.0 (0)              | 109.9 (0.6)    | 119.2 (0.1)    | 125.8 (0.2)             | 87.7 (0.4)   | 468            |
| D8_12_04_Tora         | 0.9 (0)      | 0.9 (0.1)   | 18.8 (0.2)        | 0.0 (0)              | 39.1 (1.8)     | 103.1 (0.7)    | 142.8 (0.8)             | 126.5 (0.8)  | 432            |
| D9_02_06_Lisa         | 0.0 (0)      | 0.0 (0)     | 18.2 (0.1)        | 0.2 (0)              | 117.4 (1.1)    | 27.5 (0.3)     | 204.2 (0.2)             | 16.4 (0.7)   | 384            |
| D10_02_06_Linnéa      | 7.5 (0.1)    | 2.0 (0)     | 21.1 (0)          | 0.1 (0.1)            | 110.1 (0.4)    | 17.0 (0.3)     | 167.2 (0.2)             | 16.3 (0)     | 341            |
| D11_02_06_Petra       | 8.3 (0.6)    | 0.2 (0)     | 25.3 (0.2)        | 0.0 (0)              | 94.2 (0.9)     | 27.6 (1.4)     | 128.1 (0.2)             | 78.8 (0.6)   | 363            |
| D12_02_06_Erna        | 19.1 (0.3)   | 3.9 (0.1)   | 19.8 (0.5)        | 0.0 (0)              | 170.6 (4.1)    | 19.5 (0.7)     | 127.5 (0.2)             | 52.4 (0.1)   | 413            |
| D13_02_06_Gertrud     | 0.4 (0)      | 0.3 (0)     | 22.3 (0.4)        | 0.1 (0)              | 136.3 (0.6)    | 8.6 (0.1)      | 151.7 (0.1)             | 15.8 (0.5)   | 336            |
| D14_02_06_Julia       | 14.3 (0)     | 2.4 (0.1)   | 14.4 (0)          | 0.0 (0)              | 61.1 (0.3)     | 24.0 (0.4)     | 143.0 (0.1)             | 28.0 (0.2)   | 287            |
| 015_09_23_Agnieska    | 0.6 (0)      | 0.2 (0.1)   | 25.6 (0.1)        | 0.6 (0.3)            | 107.2 (0.2)    | 20.3 (0.2)     | 25.8 (0)                | 104.1 (2.2)  | 284            |

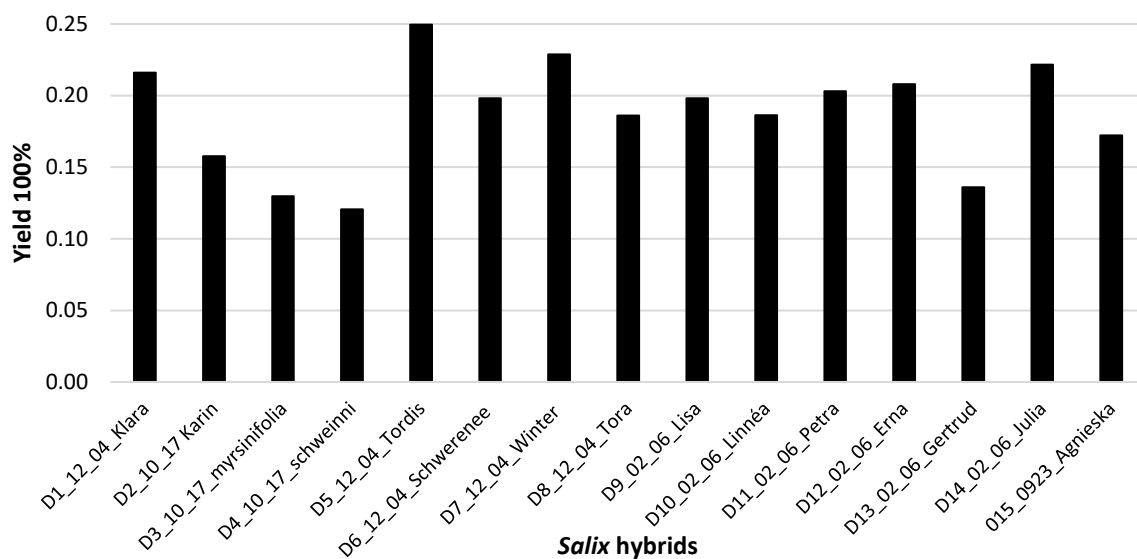

**Figure S14.** Hot water extract (HWE) yield from *Salix* hybrids based on one independent measurement. Title abbreviation key: code\_harvesting month\_day\_hybrid name.

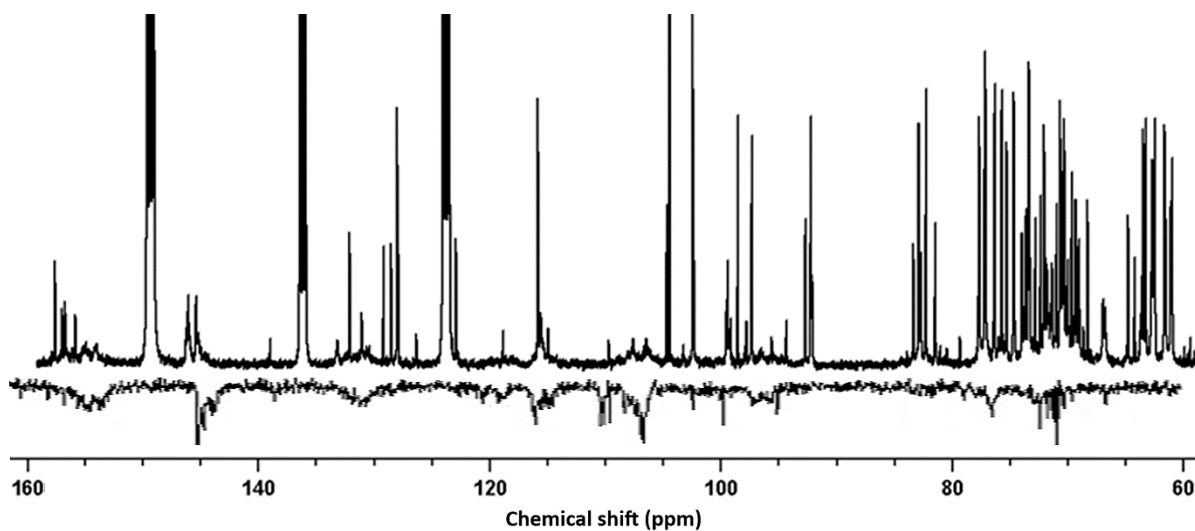

**Figure S15.** Comparison between  $^{13}\text{C}$  NMR spectra of Tora bark extract in  $\text{DMSO-}d_6$ : $\text{pyridine-}d_5$  (4:1) (top) and condensed tannin from leaves of *Leucaena leucocephala* hybrid Rendang in  $\text{D}_2\text{O/acetone-}d_6$  (1:1) (down, inverted)<sup>2</sup>.



**Table S9.** Abundance of the bioactive component from each selected hybrids and screening of willow hybrid water extracts (1 mg/mL) against four bacterial strains. The inhibitory effect was assessed visually. “++” refers to no detectable bacterial growth in the wells, “+” indicates partial growth inhibition, and “-“ no bacterial growth inhibition.

| Hybrid                 | Abundant bioactive component | Bacterial strain                   |                                         |                                         |                                          |
|------------------------|------------------------------|------------------------------------|-----------------------------------------|-----------------------------------------|------------------------------------------|
|                        |                              | <i>Escherichia coli</i> ATCC 25922 | <i>Staphylococcus aureus</i> ATCC 29213 | <i>Enterococcus faecalis</i> ATCC 29213 | <i>Salmonella typhimurium</i> ATCC 19585 |
| Klara                  | triandrin                    | -                                  | ++                                      | -                                       | -                                        |
| Karin                  | picein; triandrin            | -                                  | ++                                      | -                                       | -                                        |
| S. <i>myrsinofolia</i> | picein                       | -                                  | ++                                      | -                                       | -                                        |
| Tora                   | raffinose                    | -                                  | ++                                      | -                                       | -                                        |
| Erna                   | triandrin                    | -                                  | ++                                      | -                                       | -                                        |

**Table S10.** Raw data for acute test to *Daphnia similis* performed for 48 h at 21 °C.

| Concentration (mg/L) | Number of immobilized organisms |     |     |     | Total | % |
|----------------------|---------------------------------|-----|-----|-----|-------|---|
|                      | 1                               | 2   | 3   | 4   |       |   |
| 0                    | 0/5                             | 0/5 | 0/5 | 0/5 | 0/20  | 0 |
| DMSO control (0.1%)  | 0/5                             | 0/5 | 0/5 | 1/5 | 1/20  | 5 |
| 0.1                  | 0/5                             | 0/5 | 0/5 | 0/5 | 0/20  | 0 |
| 0.25                 | 0/5                             | 0/5 | 0/5 | 0/5 | 0/20  | 0 |
| 1                    | 0/5                             | 0/5 | 0/5 | 0/5 | 0/20  | 0 |
| 2.5                  | 0/5                             | 0/5 | 0/5 | 0/5 | 0/20  | 0 |
| 10                   | 0/5                             | 0/5 | 0/5 | 0/5 | 0/20  | 0 |
| 25                   | 0/5                             | 0/5 | 0/5 | 0/5 | 0/20  | 0 |

## Reference

[1] Dou, J.; Xu, W.; Koivisto, J. J.; Mobley, J. K.; Padmakshan, D.; Kögler, M.; Xu, C.; Willför, S.; Ralph, J.; Vuorinen, T. Characteristics of Hot Water Extracts from the Bark of Cultivated Willow (*Salix* sp.). *ACS Sustainable Chem. Eng.* **2018**, *6*, 5566–5573.

[2] Zarin, M. A.; Wan, H. Y.; Isha, A.; Armania, N. Antioxidant, antimicrobial and cytotoxic potential of condensed tannins from *Leucaena leucocephala* hybrid-Rendang. *Food Sci. Hum. Wellness* **2016**, *5*, 65–75.
